# Supplementary material for: CD38 inhibition by apigenin ameliorates mitochondrial oxidative stress through restoration of the intracellular NAD+/NADH ratio and Sirt3 activity in renal tubular cells in diabetic rats
Source: publisher site journal article supplement (doi:10.18632/aging.103410), 2020-06-07
Supplement: Supplementary file [file aging-v12i12-103410-supplementary-material-SD1.pdf]

**SUPPLEMENTARY FIGURE**

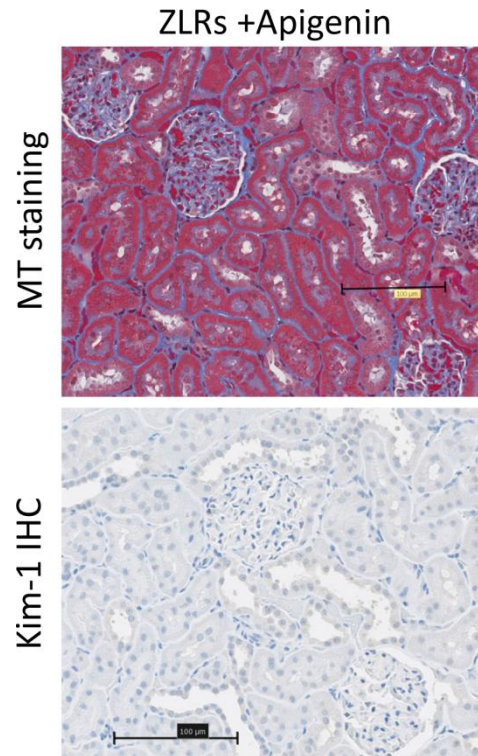

**Supplementary Figure 1. Representative photograph of Masson's trichrome (MT) staining and kidney injury molecule-1 (Kim-1) immunohistochemistry (scale bar: 100  $\mu$ m) in ZLRs treated with apigenin. ZLRs; Zucker lean rats.**
